# Supplementary material
Source: PubMed Central journal article supplement (PMC8899595)
Supplement: mmc2.pdf [file mmc2.pdf]

**Table S2. Method of scoping review.**

| Category                         | Method                                                                                                                                                                                                                                                                                                                                                                                                                                                                                         |
|----------------------------------|------------------------------------------------------------------------------------------------------------------------------------------------------------------------------------------------------------------------------------------------------------------------------------------------------------------------------------------------------------------------------------------------------------------------------------------------------------------------------------------------|
| Eligibility criteria             | <p>For each candidate study, each individual experiment was assessed for three criteria:</p> <ul style="list-style-type: none"> <li>I. Chemogenetic system(s) was applied</li> <li>II. Model(s) of neurological disease and disorder was used, and the rationale of using such model(s) was provided, and</li> <li>III. A rescue of disease-associated deficits was shown.</li> </ul> <p>Inclusion of the study was contingent upon at least one experiment satisfying all three criteria.</p> |
| Information sources              | <p>Results from an initial search of PUBMED with keywords [("gene therapy" OR "gene transfer" OR viral-vector OR Chemogenetics OR Pharmaco-genetic OR DREADD OR hM3D OR hM4D OR PSAM OR PSEM) AND (model)] for original articles published before May 2021 were combined with author contributions.</p>                                                                                                                                                                                        |
| Data charting process            | <p>References of search results and author contributions were uploaded to Covidence for subsequent screening and arbitration.</p>                                                                                                                                                                                                                                                                                                                                                              |
| Selection of sources of evidence | <p>Two authors independently screened study titles and abstracts to determine relevance, where a candidate study was deemed relevant if it satisfied at least one of the three eligibility criteria.</p> <p>Then, two authors independently assessed the full text of each relevant article to determine eligibility, which required satisfaction of all three eligibility criteria.</p> <p>All differences were arbitrated by a third author.</p>                                             |
| Data items                       | <p>For all eligibility experiments within the included studies, the following were extracted:</p> <p>Title; Journal; DOI; Category of disease of the model; Species of disease model; Chemogenetic receptor; Chemogenetic modulator (CM); CM Route of Administration; Method of receptor delivery; Promoter of transgene; Additional regulation of transgene expression; Cell-type specificity; Cre dependency; Therapeutic strategy; Ligand off-targeted effects.</p>                         |
